# Supplementary material for: Baseline quantitative hepatitis B core antibody titre alone strongly predicts HBeAg seroconversion across chronic hepatitis B patients treated with peginterferon or nucleos(t)ide analogues
Source: PubMed Central journal article supplement — Gut. 2015 Jan 13;65(2):313–20. doi: 10.1136/gutjnl-2014-308546 (PMC4752655; doi:10.1136/gutjnl-2014-308546), 2015-01-13

## **Supplementary Material**

### **Reproducibility and reliability evaluation of the double-sandwich anti-HBc assay**

Five serum specimens were used for the evaluation of the reproducibility of the double-sandwich anti-HBc assay used in the study. The anti-HBc titer of the five specimens were 0.1 IU/mL, 0.3 IU/mL, 0.6 IU/mL, 1.2 IU/mL, and 2.0 IU/mL. The reproducibility was assessed from 10 measurements of the Five specimens. The coefficient of variation (CV) was calculated to estimate the precision of the assay. To evaluate the quantitative accuracy of the assay, 80 random-selected serum specimens of CHB patients were independently measured twice by the assay (Supplementary Figure S1).

## **Supplementary Figure Legends**

**Supplementary Figure S1.** Additional performance validation of the double-sandwich anti-HBc assay. (A) Reproducibility of the anti-HBc assay. (B) Correlation analyses of the results obtained from two independent quantitative anti-HBc measurements for 80 CHB serum specimens.

**Supplementary Figure S2.** The AUROCs of kinds of parameters at different timepoints in Peg-IFN (A) and NUC (B) cohorts. AUROC: areas under the receiver operator characteristic curve; Peg-IFN, peginterferon; NUC, nucleos(t)ide analogues; Anti-HBc, hepatitis B core antibody; HBsAg: hepatitis B surface antigen; HBeAg, hepatitis B e antigen; . ALT: alanine aminotransferase.

Supplementary Figure S1.

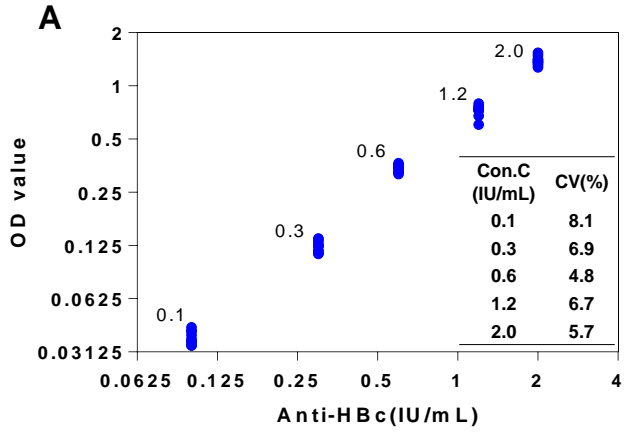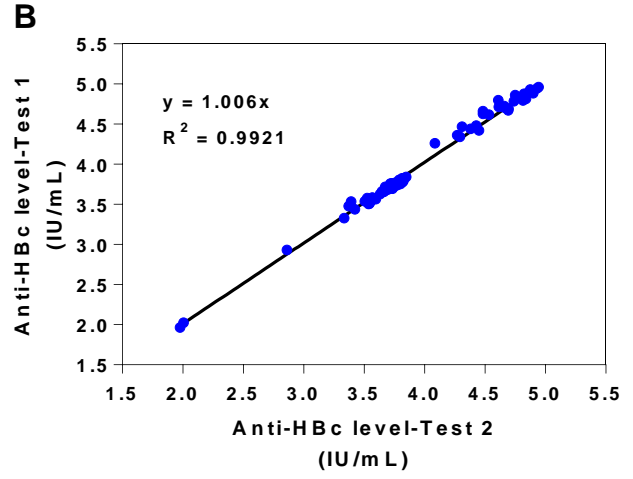

Supplementary Figure S2

**A**

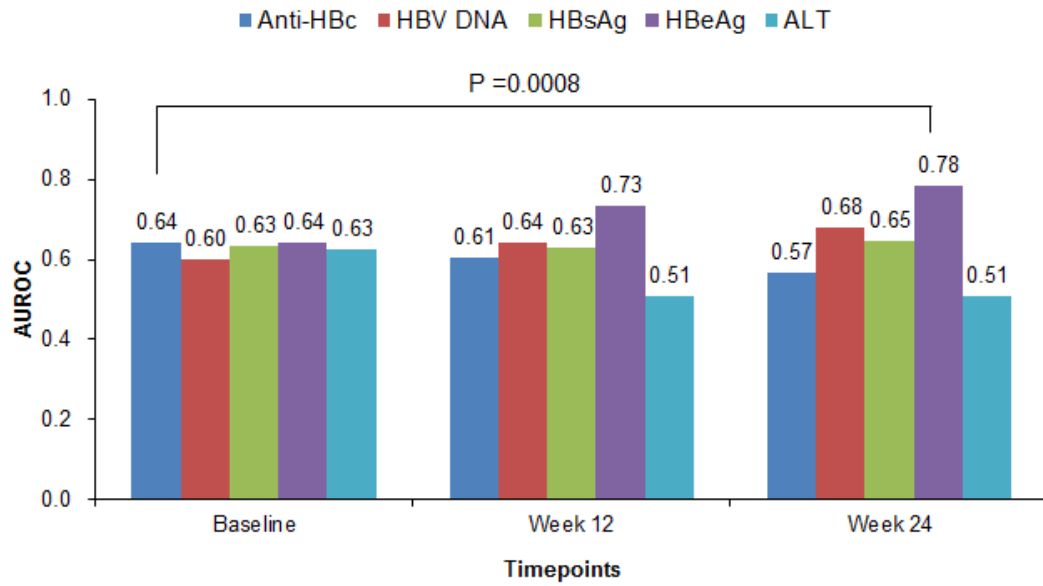

**B**

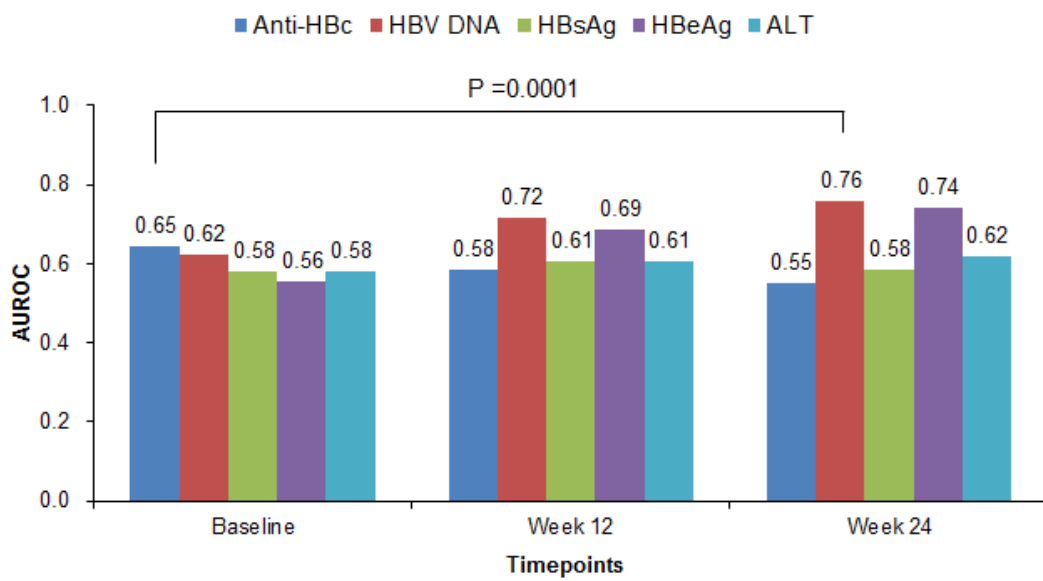

Supplement: gutjnl-2014-308546-s1.pdf [file gutjnl-2014-308546-s1.pdf]
